# Supplementary material
Source: PubMed Central journal article supplement (PMC2045595)
Supplement: JCI0731757sd.pdf [file JCI0731757sd.pdf]

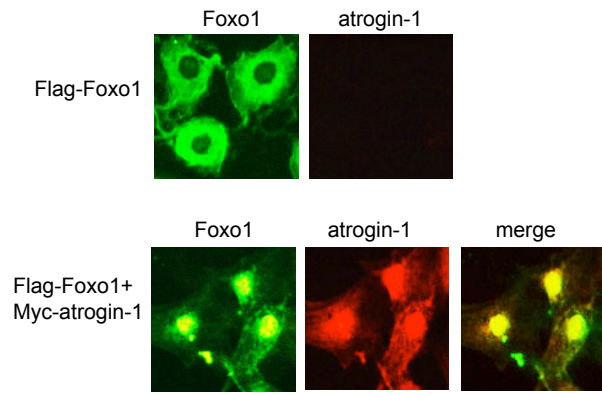

Figure S1

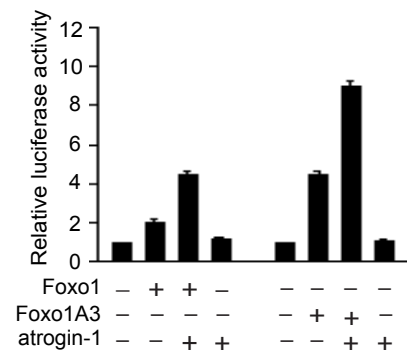

Figure S2

A

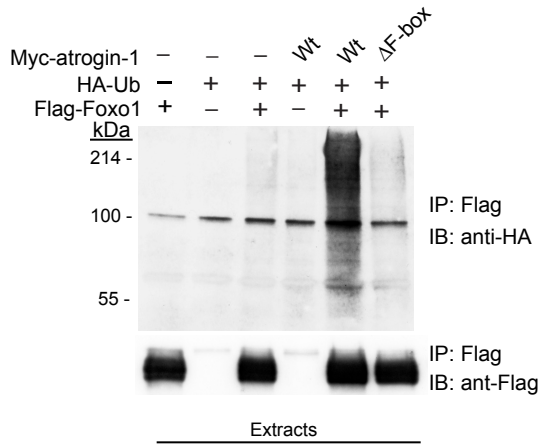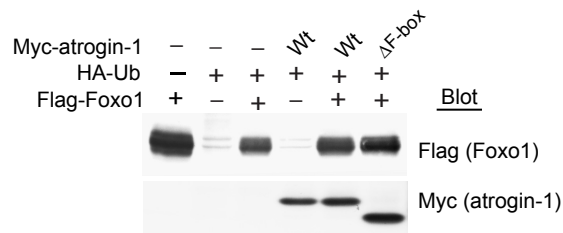

C

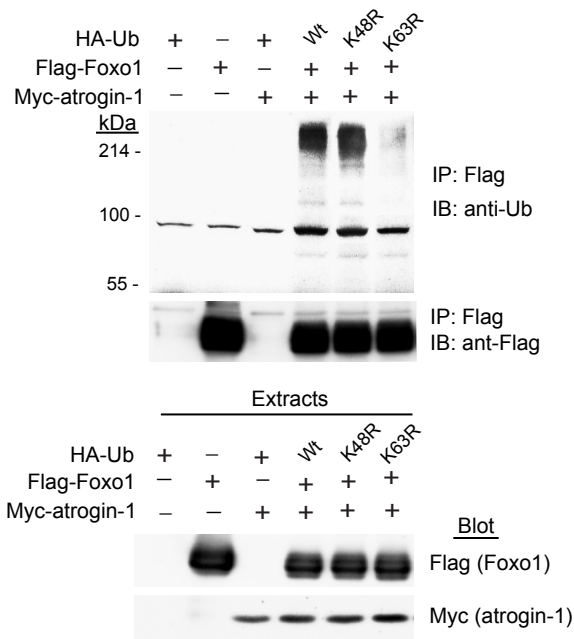

B

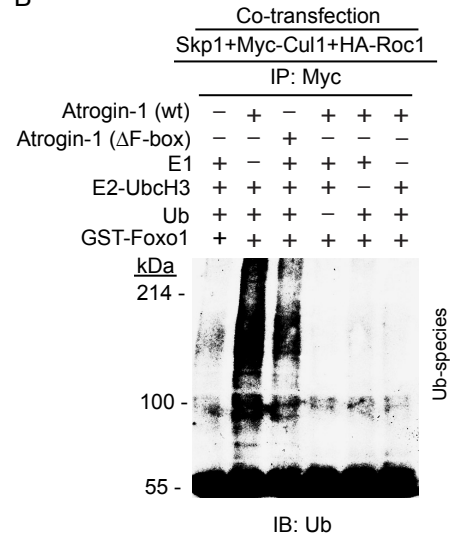

Figure S3

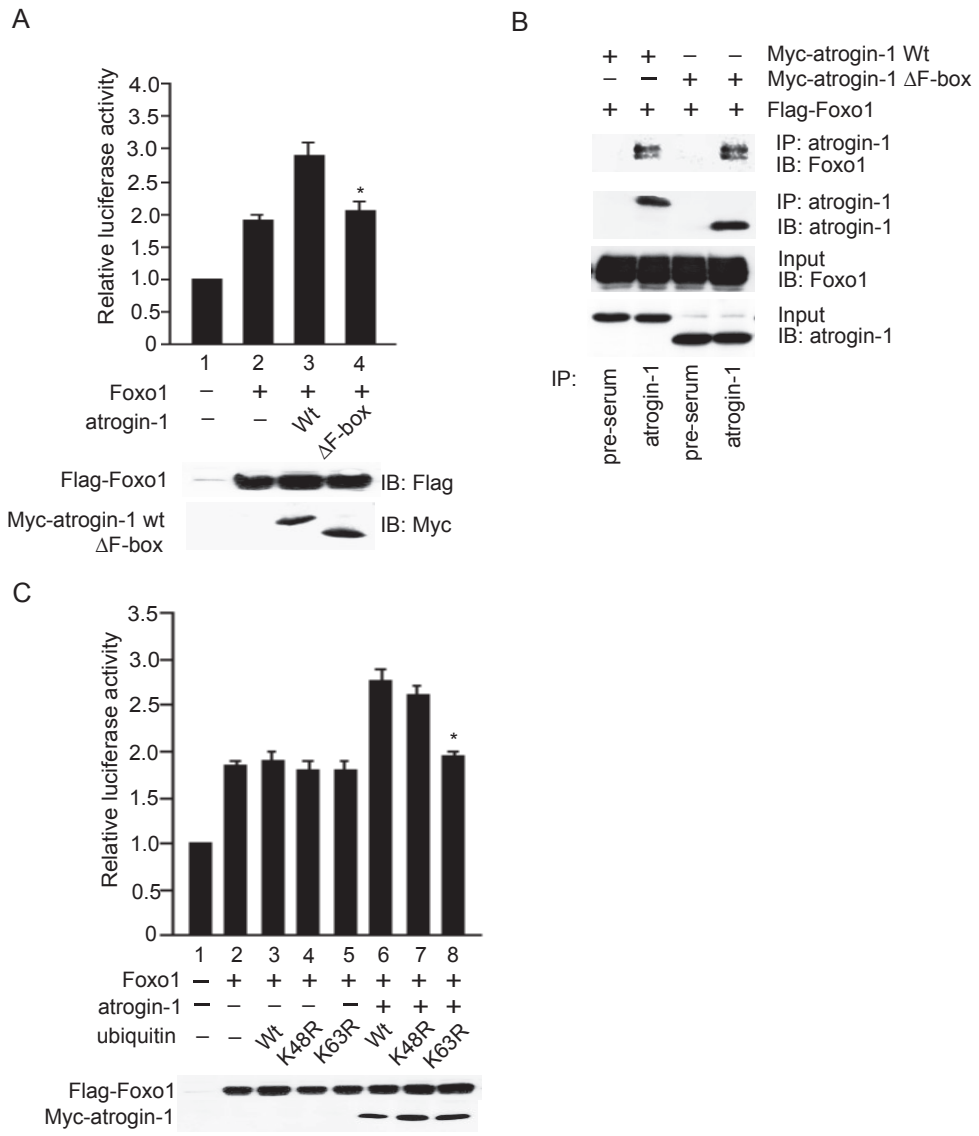

Figure S4

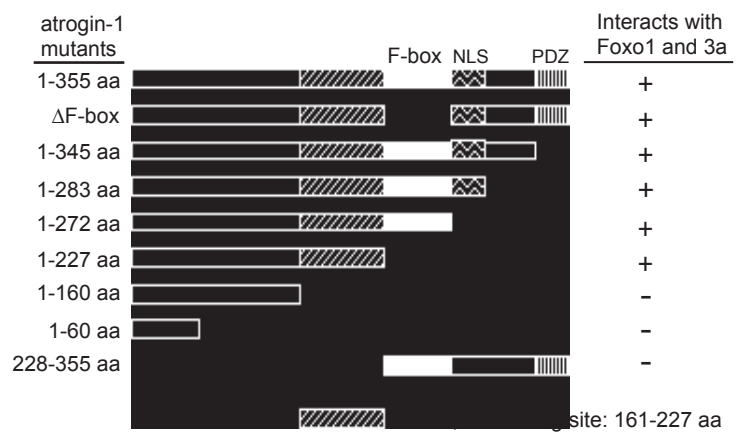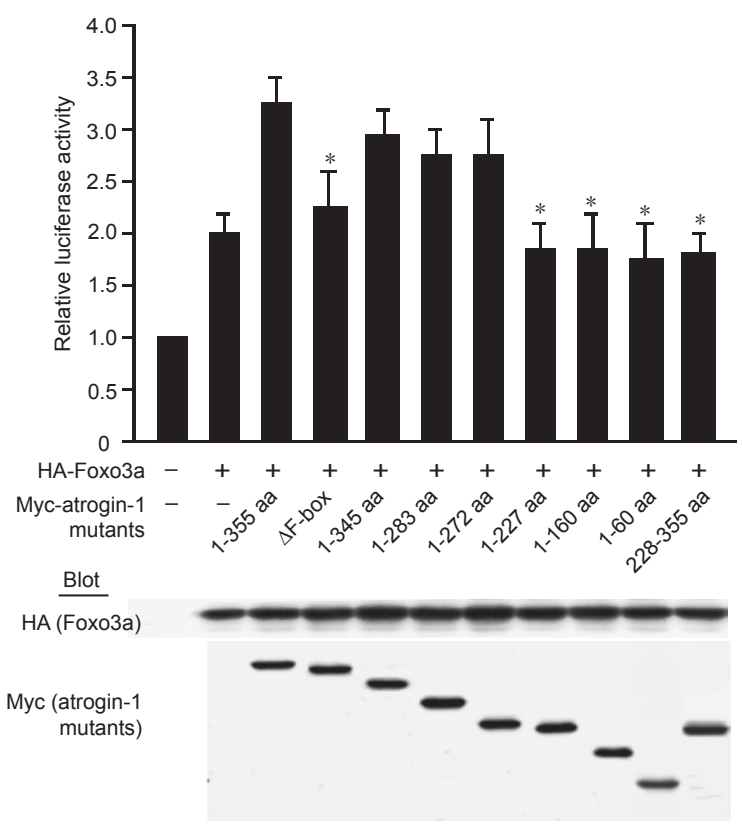

Figure 5

**Figure S1.**

Atrogin-1 regulates Foxo1 localization. Cardiomyocytes were transiently transfected with expression vectors encoding Ha-Foxo1 and/or Myc-atrogin-1. 24 h after transfection, cells were immunostained with antibodies against HA (*green*) or Myc (*red*). Representative images are shown. Magnification, x200.

**Figure S2.**

Cultured cells were transfected with Foxo1 Wt or A3 (constitutively active form), atrogin-1 together with the p27<sup>kip1</sup> reporter and  $\beta$ -galactosidase constructs. 24 h after transfection, cells were lysed and luciferase activity was measured.

**Figure S3.**

(a) 293 cells were transfected with vectors expressing HA-ubiquitin (HA-Ub), Flag-Foxo1, atrogin-1 or atrogin-1  $\Delta$ F-box mutant, as indicated. Cell extracts were immunoprecipitated with Flag antibody and analyzed by immunoblotting with the indicated antibodies (*upper panel*). An aliquot of the cell extracts was subjected to direct immunoblot analysis using anti-Flag or anti-Myc antibodies, as indicated (*lower panel*).

(b) *in vitro* ubiquitylation reactions were performed with purified ubiquitin, E1, the E2 UBC13, GST-Foxo1 and SCF<sup>atrogin-1</sup> complex. Reactions were resolved by SDS-PAGE followed immunoblotting with anti-Ub antibody.

(c) 293 cells were cotransfected with the indicated plasmids. 24 h after transfection, Ub-conjugated proteins were prepared for immunoprecipitation using anti-Flag. Immunoprecipitates were subject to SDS-PAGE followed by immunoblotting with anti-Ub or anti-Flag antibodies as indicated (*upper panel*). An aliquot of the cell extracts was

subjected to direct immunoblotting analysis using anti-Flag or anti-Myc antibodies, as indicated (*lower panel*).

**Figure S4.**

(a) Cells were transfected with Foxo1, atrogen-1 or atrogen-1  $\Delta$ F-box mutant together with the p27<sup>kip1</sup> reporter and  $\beta$ -galactosidase constructs. 24 h after transfection, cells were lysed and luciferase activity was measured (*upper panel*). Lysates were immunoblotted with anti-Flag or Myc (*lower panel*). \* $P < 0.01$  vs. atrogen-1 Wt.

(b) 293 cells were transfected with the indicated plasmids. Equal amounts of protein lysates were IP with the anti-atrogen-1 antibody or pre-serum control and analyzed by immunoblotting with the indicated antibodies. WCE, whole cell extract.

(c) Cardiomyocytes were cotransfected with the indicated plasmids together with the p27<sup>kip1</sup> reporter and  $\beta$ -galactosidase constructs. 24 h after transfection, cells were lysed and luciferase activity was measured (*upper panel*). Lysates were immunoblotted with anti-Flag or Myc (*lower panel*). \* $P < 0.001$  vs. ubiquitin Wt and K48R.

**Figure S5.**

(*Upper panel*) Schematic representation of deletion constructs of atrogen-1 used in (Figure 2D) that bind to Foxo1 and 3a.

(*Lower panel*) 293 cells were transfected with Foxo3a, atrogen-1 wt or mutants together with the p27<sup>kip1</sup> reporter and  $\beta$ -galactosidase construct. 24 hours after transfection, cells were lysed and luciferase activity was measured (top). Lysates were immunoblotted with anti-HA or Myc antibodies (bottom). \* $P < 0.01$  vs. Myc-atrogen-1 1-355 aa. The results are expressed relative to the level of expression with the reporter gene alone and are representative of three independent experiments. Error bar indicate  $\pm$  SEM.
